# Supplementary material
Source: Research Square preprint supplement (doi:10.21203/rs.3.rs-9396568/v1)
Supplement: Supplementary file 1 [file 5328db92421fda370105bafd.xlsx]

## Sheet: SDM
SDM									RMSE
									Min.	Mean	Max.
Run	Excusion time (sec)	Parameters					RMSE		0.000793103	0.000793488	0.000802692
		#VALUE!	#VALUE!		#VALUE!	#VALUE!
1	194.678	0.0364525	53.4294	3.18442e-07	1.47974	0.760847	0.000793153
2	262.122	0.0364666	53.3642	3.1746e-07	1.47942	0.760848	0.000793116
3	188.231	0.0364647	53.4054	3.17763e-07	1.47952	0.760848	0.000793131
4	167.816	0.0364521	53.4288	3.18547e-07	1.47977	0.760846	0.000793157
5	198.316	0.0364777	53.2793	3.16663e-07	1.47917	0.760851	0.000793103
6	122.407	0.0364557	53.4461	3.18346e-07	1.4797	0.760847	0.000793151
7	85.4778	0.0367004	50.5539	2.98224e-07	1.4732	0.760981	0.000802692
8	172.883	0.0364528	53.3594	3.18343e-07	1.47971	0.760849	0.000793151
9	111.772	0.0364557	53.4461	3.18346e-07	1.4797	0.760581	0.000793693
10	188.685	0.036462	53.3649	3.17804e-07	1.47953	0.760849	0.000793122
11	190.56	0.0364505	53.4256	3.18668e-07	1.47981	0.760849	0.000793163
12	181.476	0.0364722	53.3327	3.17157e-07	1.47933	0.760849	0.000793108
13	208.611	0.0364467	53.4376	3.18908e-07	1.47988	0.760848	0.000793178
14	170.802	0.0364448	53.4585	3.18911e-07	1.47988	0.760849	0.000793191
15	187.164	0.0364766	53.2841	3.1674e-07	1.4792	0.760851	0.000793103
16	201.266	0.0364635	53.3604	3.17697e-07	1.4795	0.76085	0.000793119
17	198.836	0.0364737	53.3018	3.16988e-07	1.47928	0.760851	0.000793104
18	174.68	0.0364651	53.3439	3.17526e-07	1.47945	0.76085	0.000793115
19	170.118	0.0364652	53.396	3.17693e-07	1.4795	0.760848	0.000793124
20	198.808	0.0364561	53.3832	3.18129e-07	1.47964	0.760849	0.000793138
21	196.746	0.0364623	53.3968	3.17845e-07	1.47955	0.760847	0.000793126
22	203.628	0.0364652	53.3277	3.17757e-07	1.47952	0.76085	0.000793138
23	208.904	0.0364643	53.3357	3.17699e-07	1.4795	0.760853	0.000793121
24	226.393	0.0364126	53.6419	3.20928e-07	1.48052	0.76084	0.000793452
25	201.04	0.0364519	53.4472	3.18544e-07	1.47977	0.760849	0.000793163
26	211.641	0.0364615	53.3717	3.17886e-07	1.47956	0.760849	0.000793129
27	208.799	0.0364342	53.5464	3.19878e-07	1.48019	0.760844	0.000793261
28	228.053	0.036458	53.35	3.17956e-07	1.47958	0.760849	0.000793131
29	168.231	0.036459	53.3634	3.17946e-07	1.47958	0.76085	0.000793129
30	136.112	0.0365093	53.1276	3.14392e-07	1.47845	0.760853	0.000793183

## Sheet: DDM
DDM											RMSE
											Min.	Mean	Max.
Run	Excusion time (sec)	Parameters							RMSE		0.000739175	0.000770073	0.000796681
		#VALUE!	#VALUE!	#VALUE!	#VALUE!	#VALUE!	#VALUE!	#VALUE!
1	124.112	0.0364623	53.4174	3.18008e-07	6.9805e-98	1.4796	2	0.760848	0.000760145
2	95.4101	0.0388265	61.233	2.28988e-06	3.43925e-08	1.91946	1.30675	0.760885	0.000746731
3	154.194	0.0364492	53.4049	0	3.18563e-07	2	1.47977	0.76085	0.000773164
4	101.841	0.036362	53.8638	0	3.23598e-07	2	1.48135	0.760834	0.000774425
5	83.188	0.0399178	65.4202	1.47485e-08	3.01758e-06	1.24747	1.93946	0.760896	0.00077071
6	170.25	0.0364465	53.4304	1.87531e-171	3.18941e-07	2	1.47989	0.760849	0.000763181
7	134.559	0.0392962	56.4639	4.86986e-07	5.22695e-11	1.54614	1	0.760879	0.000789806
8	165.824	0.0364487	53.4106	0	3.18695e-07	2	1.47982	0.76085	0.000770166
9	: 155.904199	0.0364385	53.6285	0	3.20457e-07	2	1.48037	0.760845	0.000763474
10	124.389	0.0397492	57.2699	6.10795e-11	5.3718e-07	1	1.5614	0.760881	0.000782865
11	97.8429	0.0374878	57.26	1.65412e-06	1.28486e-07	2	1.40433	0.760869	0.000746666
12	181.717	0.0364571	53.3732	3.1811e-07	0	1.47963	2	0.760849	0.000773135
13	132.897	0.0364683	53.335	4.89195e-205	3.17439e-07	2	1.47942	0.760851	0.000773113
14	146.321	0.0394417	63.938	3.19743e-06	2.51289e-08	1.97888	1.2823	0.760896	0.00076027
15	47.2294	0.0366746	54.276	4.10867e-07	2.60595e-07	2	1.46258	0.760847	0.000780612
16	126.436	0.036456	53.3699	6.14762e-225	3.18129e-07	2	1.47964	0.760848	0.000763137
17	176.697	0.0371275	55.7771	1.21248e-06	1.70021e-07	2	1.42711	0.760868	0.000757588
18	144.484	0.0366713	54.295	2.56771e-07	4.5864e-07	1.46147	2	0.760848	0.000770731
19	158.693	0.0364615	53.3647	0	3.17763e-07	2	1.47952	0.760848	0.000793123
20	56.9222	0.0354615	62.1672	2.63723e-11	4.48293e-07	1.06361	1.51777	0.760525	0.000796681
21	103.013	0.0364588	53.382	3.17949e-07	4.69708e-106	1.47958	2	0.760847	0.000763131
22	152.245	0.0364804	53.2617	3.1646e-07	0	1.47911	2	0.760851	0.000773104
23	165.05	0.0364366	53.4554	0	3.19569e-07	2	1.48009	0.760847	0.000793233
24	184.001	0.0365099	54.0077	3.08311e-07	2.80159e-07	2	1.46903	0.760848	0.000786101
25	53.0509	0.0364091	53.7044	3.22507e-07	1.19935e-14	1.481	1.99094	0.760843	0.000764006
26	124.401	0.0367322	54.4146	7.06952e-07	2.29063e-07	2	1.45205	0.760851	0.000774228
27	177.265	0.0364708	53.3561	0	3.17236e-07	2	1.47935	0.760848	0.000763112
28	110.941	0.0364628	53.3643	8.91326e-54	3.1768e-07	1	1.47949	0.760849	0.00076312
29	87.3208	0.0379193	58.8036	2.14096e-06	9.06103e-08	2	1.37662	0.760875	0.000739175
30	110.185	0.036437	53.5181	6.67094e-88	3.198e-07	2	1.48016	0.760846	0.000773254

## Sheet: TDM
TDM													RMSE
													Min.	Mean	Max.
Run	Excusion time (sec)	Parameters									RMSE		0.000696016	0.000743192	0.000793133
		#VALUE!	#VALUE!	#VALUE!	#VALUE!	#VALUE!	#VALUE!	#VALUE!	#VALUE!	#VALUE!
1	168.67	0.0369941	54.358	3.02744e-08	4.11401e-07	4.15151e-22	1.34543	1.5634	5	0.760856	0.000778378
2	121.832	0.0376786	100	1.90275e-07	3.49784e-10	0.000251893	1.43134	1.99998	5	0.760745	0.000720508
3	249.137	0.0365213	53.9803	2.91058e-07	0	2.23457e-07	1.47227	1.99973	2	0.760836	0.000787418
4	281.115	0.0368921	67.9158	2.50394e-07	3.93395e-13	0.000131338	1.45686	2	5	0.760928	0.000715648
5	215.365	0.0365205	53.3453	5.03331e-202	3.14326e-07	3.8973e-270	2	1.47843	5	0.760843	0.000743319
6	139.934	0.0373165	56.304	3.93876e-07	2.04058e-11	6.03848e-18	1.50941	0.999547	2	0.76084	0.000743295
7	119.562	0.0364679	53.339	3.17376e-07	2.23194e-48	0	1.4794	2	5	0.760849	0.00074311
8	133.264	0.0383807	67.4039	5.32191e-08	1.13058e-06	9.06683e-05	1.33974	1.82553	5	0.760938	0.000719604
9	414.877	0.036547	54.2795	2.79945e-07	0	2.99981e-07	1.46891	2	2	0.760855	0.00078418
10	274.298	0.0364496	53.4773	3.18769e-07	0	4.50851e-187	1.47984	2	5	0.760843	0.000743174
11	596.233	0.0379191	91.1688	0	1.78564e-07	0.000252364	2	1.42541	5	0.760878	0.000696016
12	229.934	0.0371589	70.194	9.19916e-250	2.3419e-07	0.000145289	2	1.45043	5	0.760809	0.000706236
13	282.09	0.0383087	100	1.39179e-07	2.68392e-07	0.000287464	1.40441	2	5	0.760985	0.000708219
14	184.735	0.0365001	63.7277	2.87145e-07	4.62586e-24	8.60161e-05	1.47004	2	5	0.760857	0.000747783
15	219.126	0.0364439	53.4524	0	3.19135e-07	5.45333e-126	2	1.47995	5	0.760848	0.000743194
16	52.2477	0.0372093	62.3837	4.18515e-07	3.80958e-08	7.13551e-05	1.59013	1.34493	5	0.760876	0.000743997
17	212.578	0.0364576	53.3853	3.18074e-07	0	1.18644e-231	1.47962	2	5	0.760848	0.000793133
18	127.916	0.0377434	100	2.79813e-225	1.8123e-07	0.000272611	2	1.42692	5	0.760894	0.000707282
19	197.472	0.0364736	53.305	9.84394e-85	3.17007e-07	4.04512e-114	2	1.47928	5	0.76085	0.000793105
20	99.1418	0.0364066	53.6014	3.21272e-07	1.09817e-14	6.03043e-21	1.48063	2	5	0.760835	0.000743611
21	255.973	0.0364727	53.323	6.72495e-29	3.17086e-07	0	2	1.47931	2	0.76085	0.000743106
22	100.097	0.039162	62.9073	3.39327e-08	3.21445e-06	6.00391e-56	1.30286	1.99991	2	0.760888	0.000750429
23	177.367	0.0399118	66.0253	1.81152e-08	3.76262e-06	0	1.2591	2	2	0.760921	0.000781773
24	315.164	0.0501321	100	5.94742e-49	3.19136e-09	3.66632e-05	0.20276	1.1375	2.70531	0.761063	0.00073035
25	203.793	0.0370273	65.6546	0	2.5121e-07	0.000113866	1.99996	1.45703	5	0.760907	0.000714983
26	281.193	0.0364751	53.4033	0	3.17348e-07	2.83933e-90	2	1.47939	5	0.760851	0.000743152
27	233.075	0.0369964	65.7496	2.45565e-07	0	0.000123852	1.4549	2	5	0.760922	0.000713666
28	243.882	0.036448	53.3912	3.18626e-07	0	2.16201e-43	1.47979	2	5	0.76085	0.000783169
29	420.123	0.0367949	65.0222	2.63226e-07	0	0.00011034	1.46159	2	5	0.760909	0.00072334
30	159.244	0.0388877	100	2.60032e-08	1.42284e-07	0.000141553	1.31476	1.479	3.9944	0.760945	0.000750589
